# Supplementary material for: Carbapenem-Resistant Acinetobacter baumannii from Serbia: Revision of CarO Classification
Source: PubMed Central journal article supplement (PMC4378888; doi:10.1371/journal.pone.0122793), 2015-03-30
Supplement: pone.0122793.s001.pdf [file pone.0122793.s001.pdf]

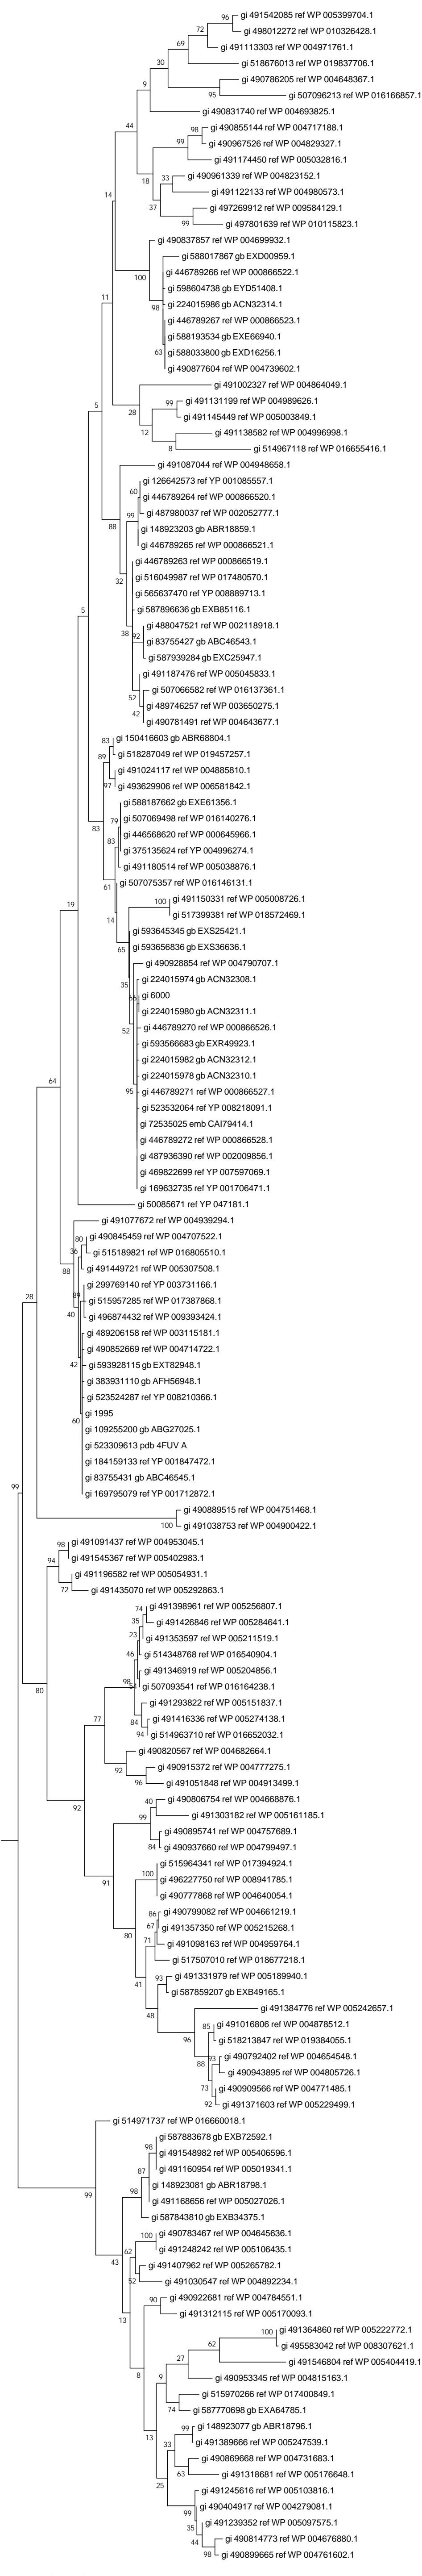

0.1
